# Supplementary material
Source: Springer Nature journal article supplement (https://www.springermedizin.de/resource/supplementary/12891_2012_1749_MOESM3_ESM.pdf/9508478)

# Person-Item Threshold Distribution

(Grouping Set to Interval Length of 0,20 making 100 Groups)

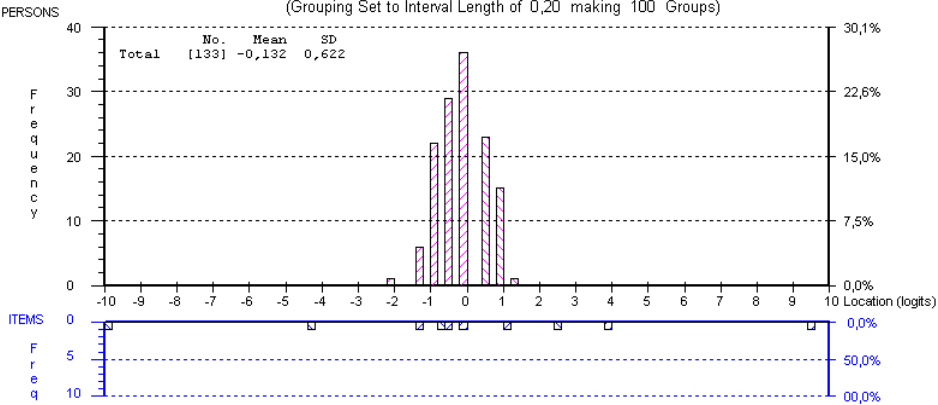

Supplement: MOESM3 [file 9508478]
